# Supplementary material for: Ultrasensitive LC-MS/MS quantitation of the N-nitroso-dabigatran etexilate impurity in dabigatran etexilate mesylate using an electrospray ionization technique
Source: Royal Society of Chemistry journal article supplement (doi:10.1039/d4ay01710b), 2025-01-01
Supplement: d4ay01710b1.pdf [file d4ay01710b1.pdf]

## **Ultrasensitive LC-MS/MS Quantitation of N-Nitroso-Dabigatran Etextilate Impurity in Dabigatran Etextilate Mesylate Using Electrospray Ionization Technique**

Anant D. Yadav<sup>1,3</sup>, Ashish C. Alaspure<sup>2,3</sup>, Sandesh R. Lodha<sup>2</sup>, Amrutlal L. Prajapat<sup>1</sup>, Anil H. Gore<sup>1\*</sup>

<sup>1</sup>Tarsadia Institute of Chemical Science, Uka Tarsadia University, Bardoli, 394350, Gujarat, India

<sup>2</sup>Maliba Pharmacy College, Uka Tarsadia University, Maliba Campus, Gopal Vidyanagar, Bardoli, 394350, Gujarat, India

<sup>3</sup>Analytical Research and Development, Alkem Laboratories Ltd., Bharuch, 393010, Gujarat, India

---

Corresponding Author: Dr. Anil H. Gore Email: [anilanachem@gmail.com](mailto:anilanachem@gmail.com)

**Table S1:** Optimized tandem mass spectrophotometer (MS/MS) parameters and time segments.

|                              |                                      |          |           |
|------------------------------|--------------------------------------|----------|-----------|
| Parameters                   | Values                               |          |           |
| Ionization mode              | +ve                                  |          |           |
| Gas temperature              | 350°C                                |          |           |
| Nebulizer                    | 25 psi                               |          |           |
| Sheath gas temperature       | 350°C                                |          |           |
| Sheath gas flow              | 12 L/min                             |          |           |
| Capillary                    | 3500 V                               |          |           |
| Nozzle Voltage               | 500 V                                |          |           |
| Scan segments                |                                      |          |           |
| Compound Name                | N-nitroso-dabigatran etexilate (NDE) |          |           |
| Precursor Ion                | 657.2                                |          |           |
| Product Ion                  | 364.1                                |          |           |
| Dwell                        | 200                                  |          |           |
| Fragmentor (V)               | 20                                   |          |           |
| Collision Energy (V)         | 20                                   |          |           |
| Cell accelerator voltage (V) | 3                                    |          |           |
| Polarity                     | +ve                                  |          |           |
| Time segments                |                                      |          |           |
| Start time (min)             | Scan Type                            | Valve    | Delta EMV |
| 0                            | MRM                                  | To Waste | 500       |
| 16.7                         | MRM                                  | To MS    | 500       |
| 25                           | MRM                                  | To Waste | 500       |

**Table S2:** Summary of linearity results for solutions from LOD to 200% of the limit level.

| Linearity level w.r.t 60 ppb   | NDE                   |               |
|--------------------------------|-----------------------|---------------|
|                                | Concentration (ng/mL) | Area response |
| <b>10% (LOD)</b>               | 0.0604                | 7191          |
| <b>30% (LOQ)</b>               | 0.1812                | 18535         |
| <b>50%</b>                     | 0.3021                | 31965         |
| <b>80%</b>                     | 0.4833                | 50999         |
| <b>100%</b>                    | 0.6041                | 57388         |
| <b>150%</b>                    | 0.9062                | 85185         |
| <b>200%</b>                    | 1.2083                | 114359        |
| <b>Correlation coefficient</b> |                       | 0.999         |
| <b>Slope</b>                   |                       | 92202.9       |
| <b>Intercept</b>               |                       | 2895.2        |

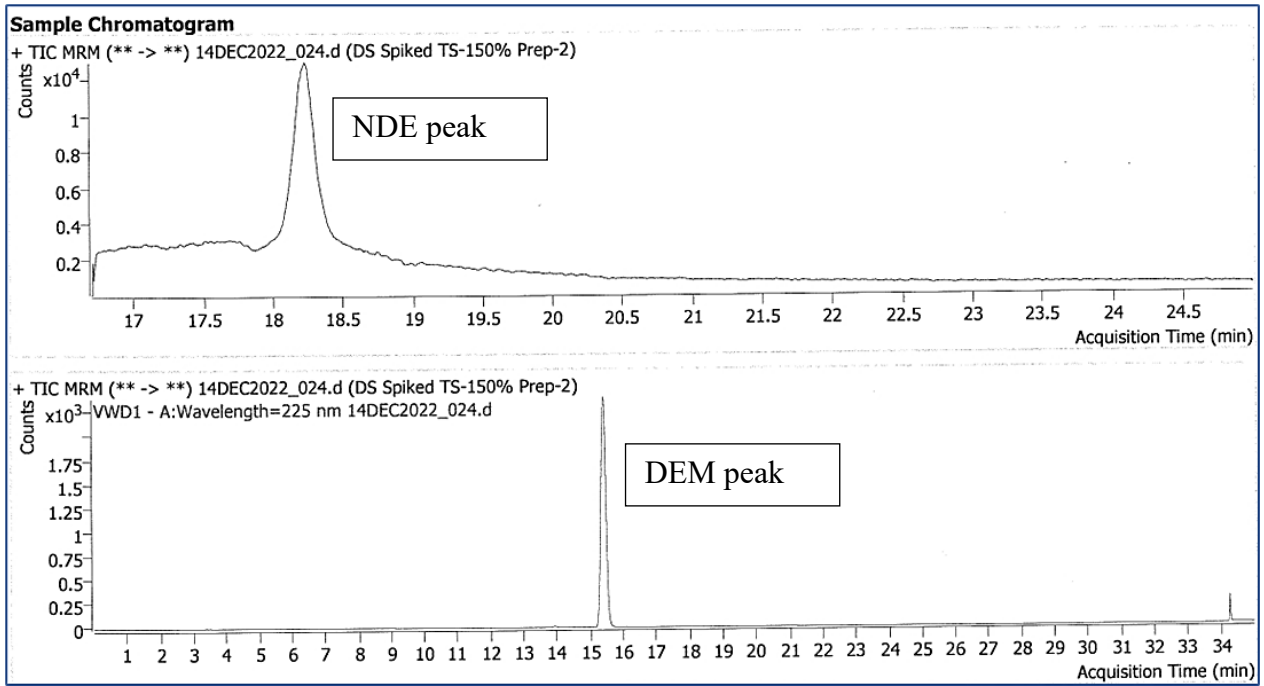

**Fig. S1:** TIC and UV chromatogram showing the separation of NDE impurity from DEM drug peak.

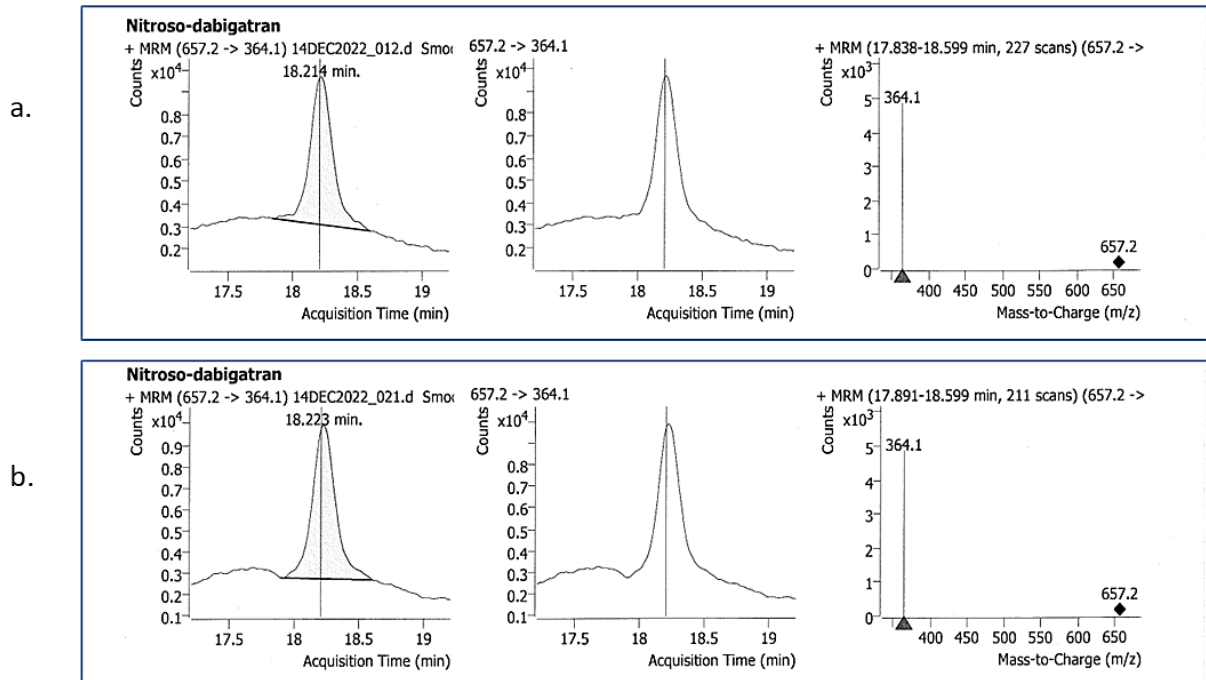

**Fig. S2:** a. NDE spiked with drug product and b. NDE spiked with drug substance.
